# Supplementary material for: β-Diiminato ligand (L) transformations in reactions of KL with PI3and I2[L = {N(C6H3Pri2-2,6)C(H)}2CPh]
Source: Royal Society of Chemistry journal article supplement (doi:10.1039/b611260a), 2006-11-24
Supplement: b611260a.pdf [file b611260a.pdf]

## $\beta$ -Diiminato ligand (L) transformations in reactions of KL with PI<sub>3</sub> and I<sub>2</sub> [L = {N(C<sub>6</sub>H<sub>3</sub>Pr<sup>i</sup><sub>2</sub>-2,6)C(H)}<sub>2</sub>CPh]

Peter B. Hitchcock, Michael F. Lappert,\* Gang Li and Andrey V. Protchenko

The Chemistry Department, University of Sussex, Brighton, BN1 9QJ, U.K. Fax: 44 1273 677196; Tel: 44 1273 678316; E-mail: [m.f.lappert@sussex.ac.uk](mailto:m.f.lappert@sussex.ac.uk)

### Experimental details

**General Methods:** All manipulations were carried out in an atmosphere of dry argon using standard Schlenk tube techniques. Solvents were dried from the appropriate drying agent, distilled, degassed and stored over a potassium mirror. The NMR spectra were recorded on a DPX 300 spectrometer with solvent signals as internal reference (<sup>1</sup>H and <sup>13</sup>C{<sup>1</sup>H}) or with an external reference (85% H<sub>3</sub>PO<sub>4</sub> for <sup>31</sup>P{<sup>1</sup>H}). Elemental analyses (C, H, N) were carried out at the University of North London. Phosphorus content was determined using Perkin Elmer Plasma 400 ICP-AES instrument. KL was prepared by refluxing a thf solution of LH with excess KH; the latter was removed by filtration and the concentration of KL in the solution was determined by titration of an aliquot with 0.1 M HCl.

*Synthesis of [P(I){N(Ar)C(H)}<sub>2</sub>C(C<sub>6</sub>H<sub>4</sub>-4)C(Ph)(CH=NAr)<sub>2</sub>]<sup>+</sup>[I<sub>3</sub>]<sup>-</sup> (I).* KL (3.73 mmol, 26.3 mL of a 0.142 M solution in thf) was added dropwise to a solution of PI<sub>3</sub> (1.54 g, 3.74 mmol) in thf (20 mL) under stirring at -35 °C. The mixture was warmed up to room temperature and stirred for 24 h. The volatiles were removed in *vacuo*, and the residue was treated with Et<sub>2</sub>O producing a dark red solution and a red-orange precipitate (0.88 g). The precipitate was filtered off and dried; the featureless <sup>1</sup>H NMR spectrum and the phosphorus content of 8.65% indicated that it consisted of P<sub>2</sub>I<sub>4</sub> and KI (for the 1 : 1 mixture, the calculated P content is 8.42%); thus, the total amount of phosphorus in the precipitate was 0.076 g (2.45 mmol, 65.5% based on PI<sub>3</sub>). The dark-red filtrate was concentrated and layered with hexane. Storing at room temperature for 5 days gave compound **1** (1.0 g, 0.68 mmol, 36.4% based on L or 18.2% based on PI<sub>3</sub>) as red needle crystals decomposing without melting above 130 °C. Anal. Calc. for C<sub>66</sub>H<sub>81</sub>I<sub>4</sub>N<sub>4</sub>P: C, 53.9; H, 5.51; N, 3.81. Found: C, 53.8, H, 5.41, N, 3.83%. <sup>31</sup>P{<sup>1</sup>H} NMR (C<sub>6</sub>D<sub>6</sub>):  $\delta$

# Supplementary Material (ESI) for Chemical Communications

# This journal is (c) The Royal Society of Chemistry 2006

118.9 and 118.5.  $^1\text{H}$  NMR (thf- $d_8$ ):  $\delta$  9.01 (br s, 1 H), 8.96 (d, 1 H,  $J = 1.5$  Hz), 8.51 (br s, 1 H), 7.84-6.95 (m, 22 H), 3.33 (two septets, 4 H,  $\text{CHMe}_2$ ), 3.12 (septet, 1 H,  $J = 6.6$  Hz,  $\text{CHMe}_2$ ), 2.96 (septet, 3 H,  $J = 6.6$  Hz,  $\text{CHMe}_2$ ), 1.51 (d, 12 H,  $J = 6.6$  Hz,  $\text{CHMe}_2$ ), 1.39 (d, 12 H,  $J = 6.6$  Hz,  $\text{CHMe}_2$ ), 1.26 (two d, 6 H,  $J = 6.6$  Hz,  $\text{CHMe}_2$ ), 1.06 (m, 18 H,  $\text{CHMe}_2$ ).

*Synthesis of  $[\overline{\text{N}(\text{Ar})\text{C}(\text{H})\text{C}(\text{Ph})\text{C}(\text{H})\text{N}(\text{Ar})}]^+ [\text{I}_5]^-$  (**2**).* A solution of  $\text{I}_2$  (0.5 g, 1.97 mmol) in  $\text{Et}_2\text{O}$  (20 mL) was added to a stirred suspension of KL (1.97 mmol, obtained by removing thf from 20 mL of 0.098 M solution) in  $\text{Et}_2\text{O}$  (20 mL) at room temperature. After stirring overnight the mixture was filtered, the filtrate was concentrated and stored at  $-27$  °C for 3 days yielding dark red crystals of compound **2** (0.16 g, 0.15 mmol, 22% based on  $\text{I}_2$ ), mp 175 °C (decomp.). Anal. Calc. for  $\text{C}_{33}\text{H}_{41}\text{I}_5\text{N}_2$ : C, 36.0; H, 3.73; N, 2.55. Found: C, 36.0, H, 3.93, N, 2.63%.  $^1\text{H}$  NMR (thf- $d_8$ ):  $\delta$  9.64 (s, 1 H,  $\text{NCHCPh}$ ), 7.84 (d, 2 H,  $J = 7.3$  Hz,  $o\text{-H}^{\text{Ph}}$ ), 7.69 (t, 2 H,  $J = 8.0$  Hz,  $p\text{-H}^{\text{Ar}}$ ), 7.62 (t, 2 H,  $J = 7.7$  Hz,  $m\text{-H}^{\text{Ph}}$ ), 7.54 (t, 1 H,  $J = 7.3$  Hz,  $p\text{-H}^{\text{Ph}}$ ), 7.49 (d, 4 H,  $J = 8.0$  Hz,  $m\text{-H}^{\text{Ar}}$ ), 2.22 (septet, 4 H,  $J = 6.6$  Hz,  $\text{CHMe}_2$ ), 1.27 (d, 12 H,  $J = 6.6$  Hz,  $\text{CHMe}_2$ ), 0.90 (d, 12 H,  $J = 6.6$  Hz,  $\text{CHMe}_2$ ).  $^{13}\text{C}$  NMR (thf- $d_8$ ):  $\delta$  158.6, 148.4, 144.8, 134.7, 130.7, 128.0, 127.2, 127.0, 126.0, 30.7, 26.1, 22.2.

**Crystallography:** Data for the crystal structure determination of **1** and **2** were collected on a Nonius Kappa CCD diffractometer at 173(2) K with Mo- $\text{K}\alpha$  X-rays ( $\lambda = 0.71073$  Å). Crystal data and refinement details are listed in Table 1S. The structures were solved by direct method and refined using SHELXL-97. In crystals of complex **2** there is one  $\text{I}_5$  anion in a general position and two cations lying on 2-fold rotation axes.

**Table 1S** Crystal data and structure refinement for **1** and **2**

| Compound                                              | <b>1</b>                                                        | <b>2</b>                                                      |
|-------------------------------------------------------|-----------------------------------------------------------------|---------------------------------------------------------------|
| Empirical formula                                     | C <sub>66</sub> H <sub>81</sub> I <sub>4</sub> N <sub>4</sub> P | C <sub>33</sub> H <sub>41</sub> I <sub>5</sub> N <sub>2</sub> |
| Formula weight                                        | 1468.92                                                         | 1100.18                                                       |
| Crystal system                                        | Triclinic                                                       | Orthorhombic                                                  |
| Space group                                           | <i>P</i> $\bar{1}$ (No. 2)                                      | <i>Pnc</i> 2 (No. 30)                                         |
| <i>a</i> /Å                                           | 10.4165(2)                                                      | 21.8936(5)                                                    |
| <i>b</i> /Å                                           | 17.3501(5)                                                      | 13.9582(3)                                                    |
| <i>c</i> /Å                                           | 19.9124(6)                                                      | 12.3029(3)                                                    |
| $\alpha$ /°                                           | 67.651(1)                                                       | 90                                                            |
| $\beta$ /°                                            | 88.601(2)                                                       | 90                                                            |
| $\gamma$ /°                                           | 79.776(2)                                                       | 90                                                            |
| <i>V</i> /Å <sup>3</sup>                              | 3271.88(15)                                                     | 3759.71(15)                                                   |
| <i>Z</i>                                              | 2                                                               | 4                                                             |
| <i>D</i> <sub>c</sub> /Mg m <sup>-3</sup>             | 1.49                                                            | 1.94                                                          |
| $\mu$ (Mo-K $\alpha$ )/mm <sup>-1</sup>               | 1.97                                                            | 4.16                                                          |
| <i>F</i> (000)                                        | 1464                                                            | 2072                                                          |
| Reflections collected                                 | 48640                                                           | 23950                                                         |
| Independent reflections                               | 12860 [R(int) = 0.057]                                          | 7201 [R(int) = 0.048]                                         |
| Reflections with <i>I</i> > 2 $\sigma$ ( <i>I</i> )   | 8372                                                            | 5894                                                          |
| Data/restraints/parameters                            | 12860/0/676                                                     | 7201/1/365                                                    |
| Goodness-of-fit on <i>F</i> <sup>2</sup>              | 1.020                                                           | 1.020                                                         |
| Final R indices [ <i>I</i> > 2 $\sigma$ ( <i>I</i> )] | <i>R</i> 1 = 0.055, <i>wR</i> 2 = 0.096                         | <i>R</i> 1 = 0.039, <i>wR</i> 2 = 0.080                       |
| R indices (all data)                                  | <i>R</i> 1 = 0.101, <i>wR</i> 2 = 0.111                         | <i>R</i> 1 = 0.055, <i>wR</i> 2 = 0.085                       |
| Largest diff. peak and hole/ e Å <sup>-3</sup>        | 1.39 and -1.13 (near I)                                         | 0.73 and -0.73                                                |
